1 Thirty-five experimental fisheries reveal the  
2 mechanisms of selection

---

3 Sébastien Nusslé<sup>1\*</sup>, Andrew P. Hendry<sup>2</sup>, Roland A. Knapp<sup>3</sup>, Michael T. Bogan<sup>1,4</sup>, Anna  
4 M. Sturrock<sup>1</sup>, & Stephanie M. Carlson<sup>1</sup>

5

6 snussle@gmail.com

7

8 <sup>1</sup>Department of Environmental Science, Policy & Management, University of  
9 California, Berkeley, CA, USA

10 <sup>2</sup>Redpath Museum & Department of Biology, McGill University, Montreal, Quebec,  
11 Canada

12 <sup>3</sup>Sierra Nevada Aquatic Research Laboratory, University of California, Mammoth  
13 Lakes, CA, USA

14 <sup>4</sup>Current address: School of Natural Resources and the Environment, University of  
15 Arizona, Tucson, AZ, USA

16

## 1 **Abstract**

2 Fisheries have been described as large-scale evolutionary experiments; yet such  
3 “experiments” tend to be poorly replicated and therefore lack the predictive power  
4 essential for designing appropriate management strategies to minimize the effects  
5 of fisheries-induced selection. Large-scale removal of non-native trout from 35  
6 montane lakes in California provided repeated experimental fisheries that allowed  
7 us to explore how environmental parameters affect the three potential contributors  
8 to overall selection: the fitness-trait correlation, trait variability, and fitness  
9 variability. Our results demonstrate that fishing rapidly altered the size structure of  
10 harvested populations, and that the magnitude of change was primarily driven by  
11 the fitness-trait correlation (net selectivity). Fishing-induced selection was  
12 repeatable overall but was also influenced by environmental (lake size and quality)  
13 and demographic (size structure) parameters. Decomposing fishing-induced  
14 selection into its key components can improve the management of stocks  
15 experiencing fishing-induced selection by identifying the drivers of selection and  
16 therefore the appropriate target for management.

## 17 **Text**

18 By targeting the oldest, largest, and most fecund individuals, size-selective fishing  
19 can reduce recruitment and yield <sup>1,2</sup> and induce evolutionary changes that  
20 negatively influence stock productivity, resiliency, and recovery <sup>3,4</sup>. However, two  
21 major issues have hindered efforts to incorporate fishing-induced selection into

1 conservation plans and management strategies <sup>5-7</sup>. First, studies of fishing-induced  
2 selection are typically not well replicated within a species, and therefore lack the  
3 potential to test for causal drivers through comparative analyses <sup>8</sup>. Second, selection  
4 can be shaped by three key components (the fitness-trait correlation, trait  
5 variability, and fitness variability) <sup>9,10</sup> that have not been considered individually in  
6 fisheries science, and yet have different implications for management (see below).  
7 We circumvented these previous limitations through a study of fishing-induced  
8 selection in 35 independent populations of fishes (brook trout, *Salvelinus fontinalis*;  
9 and rainbow trout, *Oncorhynchus mykiss*).

10 The study populations were fished to extirpation through a large-scale non-native  
11 fish removal as part of a habitat restoration and endangered species recovery  
12 program in high elevation lakes of California's Sierra Nevada. Over 45,000 fish were  
13 removed by means of gillnets and electrofishing, with length-at-capture and date-at-  
14 capture recorded for nearly every captured fish <sup>11,12</sup>. After every fishing event, we  
15 estimated the selection differential on fish length as the difference in the population  
16 mean trait value before and after selection. This differential is equal to the  
17 covariance between the trait and relative fitness <sup>9,10</sup>, which can be partitioned into  
18 the product of three components: the correlation between the trait (body length)  
19 and fitness (captured = 0, not-captured = 1), the variability (standard deviation) of  
20 fitness, and the variability (standard deviation) of the trait. We then related among-  
21 population variation in these components of selection to among-population  
22 variation in lake physical characteristics (lake surface, maximum depth, elevation),  
23 demographic (fish length, population size, density), fishing gear (gillnet,

1 electrofishing), and fishing intensity (proportion of the population captured,  
2 number of fishing events, and time until extirpation) (see Extended Table 1).

### 3 Repeatable yet variable fishery selection

4 In most populations, the largest fish were quickly and consistently removed by  
5 fishing, which dramatically altered the population size structure. Both mean fish  
6 length and its variability decreased with increasing cumulative catch (Figure 1). On  
7 average, fish length decreased by  $-1.03 \text{ mm} \pm 0.13 \text{ mm (SD)}$  for each additional  
8 percent of the population removed (i.e., “mm/%”; linear mixed regression:  $t_{33.2} = -$   
9  $7.86$ ,  $p < 0.001$ ). The average shift in mean length from the start to the end of the  
10 fish removal period was  $\sim 100 \text{ mm}$  (45% of initial mean body length). Fish length  
11 variability (here measured as SD – similar results were obtained for CV) also  
12 decreased with increasing cumulative catch:  $0.32 \text{ mm} \pm 0.07 \text{ mm/\%}$  (linear mixed  
13 regression:  $t_{25.8} = -4.60$ ,  $p < 0.001$ ). These estimates are conservative because the  
14 mean duration of fish removal efforts was 2.5 years, during which time survivors  
15 would continue to grow. With a moderate growth correction (5% per year, see  
16 Methods), the estimates were  $-1.11 \pm 0.13 \text{ mm/\%}$  for mean length (linear mixed  
17 regression:  $t_{33.4} = -8.68$ ,  $p < 0.001$ ) and  $-0.35 \pm 0.06 \text{ mm/\%}$  for variability in length  
18 (linear mixed regression:  $t_{25.3} = -5.4$ ,  $p < 0.001$ ). With a larger – but still plausible –  
19 growth correction (10% per year), the estimates were  $1.18 \pm 0.13 \text{ mm/\%}$  for mean  
20 length (linear mixed regression:  $t_{33.2} = -9.37$ ,  $p < 0.001$ ) and  $-0.37 \pm 0.06 \text{ mm/\%}$  for  
21 variability in length (linear mixed regression:  $t_{25.1} = -6.06$ ,  $p < 0.001$ ). These  
22 decreases could not be explained by random harvesting because permutation

1 simulations, in which mortality was random, i.e., independent of fish length, yielded  
2 non-significant slope coefficients for mean length (Figure 2a, one-sample t-test:  $t_{99} =$   
3  $-1.173$ ,  $p = 0.25$ ) and much lower slope coefficients for length variability (Figure 2b,  
4 one-sample t-test:  $t_{99} = -9.54$ ,  $p < 0.01$ ).

5 The negative association between mean length and cumulative catch yielded  
6 increasingly negative selection differentials (i.e., acting against large fish) with  
7 increasing cumulative catch (Figure 3). Most differentials were negative (918 of  
8 1092), with the few positive estimates tending to occur when precision was low (i.e.,  
9 when few individuals remained in the population; Figure 3). The magnitude of the  
10 selection differential increased with increasing cumulative catch:  $-0.31 \pm 0.14$   
11 mm/% (mixed-model linear regression:  $t_{30.2} = -2.20$ ,  $p < 0.05$ ). As above, these  
12 effects were even stronger when length was corrected for growth during the study  
13 period:  $-0.35 \pm 0.13$  mm/% with a 5% correction (linear mixed regression:  $t_{30.2} = -$   
14  $2.6$ ,  $p < 0.05$ ); and  $-0.39 \pm 0.12$  mm/% with a 10% correction (linear mixed  
15 regression:  $t_{30.4} = -3.17$ ,  $p < 0.01$ ). Importantly, even moderate fishing intensity (30-  
16 40% of the population captured) led to selection differentials greater than 10 mm.  
17 That is, fish surviving to that level of fishing were, on average, 10-20 mm (6-13%)  
18 smaller than those in the original population (Figure 3). These estimates are similar  
19 to other freshwater fish populations subject to low or moderate fishing intensity,  
20 where selection differential estimates on individual growth tend to be 5-17%<sup>13,14</sup>.

21 Among-population variability in selection differentials increased dramatically at  
22 harvest levels above 80% (Figure 3). Indeed, modeling the distribution of selection

1 differentials after binning fishing intensity into 5% intervals revealed that the  
2 variability of selection differentials (standard deviation within each 5% interval)  
3 increased non-linearly with fishing pressure (quadratic,  $R^2 = 0.62$ ,  $F_{1,17} = 30.3$ ,  $p <$   
4  $0.001$ ). These results suggest that the outcome of size-selective fishing becomes  
5 increasingly unpredictable when catch levels are high ( $>80\%$ ), with some  
6 populations exhibiting large decreases in mean length and other populations not  
7 responding or even exhibiting increases in mean length.

8 These results confirm that fishing-induced selection can modify population size  
9 structure, even at low fishing pressures. More importantly, these results also  
10 highlight how the consequences of selection can be highly variable among replicate  
11 populations. This unpredictability could explain some of the contradictory results of  
12 fishing-induced selection reported in the literature <sup>4</sup>. Moreover, our result that size-  
13 selective fishing becomes increasingly unpredictable with higher fishing intensity  
14 provides further evidence that reducing total harvest might be the best action to  
15 recover severely impacted populations <sup>15</sup>.

## 16 **Multiple factors mediate fishery selection**

17 The outcomes of fishing-induced selection differed among populations, which  
18 provided an opportunity to explore the relative importance of the three components  
19 of selection and examine how each was affected by environmental or demographic  
20 attributes, or the fishing regime.

1 One component of selection is the correlation between the trait and fitness, in our  
2 case represented by the selectivity of the fishing gear. Our results suggest that this  
3 correlation is the most important component of selection in our system, accounting  
4 for 60.9% of the variance in selection differentials (linear regression:  $F_{1,33} = 51.5$ ,  $p <$   
5  $0.001$ , Figure 4). Variation among populations in this correlation, and hence  
6 selection differentials, could be explained by several factors. First, correlations  
7 between length and fitness were stronger in populations with initially smaller fish  
8 (proportion of variance (PoVE) in the correlation explained by mean fish length:  
9 29.6%,  $F_{1,33} = 13.9$ ,  $p < 0.001$ ). Second, correlations were stronger in populations  
10 with higher densities (PoVE = 14.7%,  $F_{1,33} = 5.68$ ,  $p < 0.05$ ). Third, correlations were  
11 weaker when the lake had at least one tributary (PoVE = 11.6%,  $F_{1,33} = 4.34$ ,  $p <$   
12  $0.05$ ). These associations indicate that in a closed environment with many relatively  
13 small fish, relatively large fish are more likely to be caught earlier. This suggests that  
14 the selectivity of fishing gear (i.e., the strongest selective force) is highly influenced  
15 by the environment. Indeed, a multiple regression including all three parameters  
16 (fish length, density, and tributary presence) explained 47.6% of the variance in  
17 correlation between trait and fitness (Figure 4).

18 Another component of selection is variability of the trait (i.e., size), which here  
19 accounted for 21.1% of the variance in selection among populations ( $F_{1,33} = 8.86$ ,  $p <$   
20  $0.01$ , Figure 4). Here too the environment played a role; length was more variable in  
21 populations at lower elevations (PoVE = 18.8%,  $F_{1,33} = 7.63$ ,  $p < 0.01$ ) and in larger  
22 lakes (PoVE = 15.2%,  $F_{1,33} = 5.93$ ,  $p < 0.05$ ). These results imply that, in our system,  
23 lakes with greater habitat suitability (i.e., lower elevations are associated with

1 warmer temperatures and a longer ice-free season <sup>16</sup>) and complexity (i.e., larger  
2 systems tend to exhibit more complex habitat structure <sup>17</sup>) support a more diverse  
3 size structure, which makes them more susceptible to selection. This result might  
4 provide insight into conflicting results in the literature, where some <sup>13,14</sup> – but not all  
5 <sup>18</sup> – studies report strong selection against large fish in heavily-fished populations.  
6 That is, even strong gear selectivity can yield only weak selection if trait variability  
7 is already low – a hypothesis that would be easy to test in ongoing fisheries.

8 The last component of selection is variability in fitness, which here accounted for  
9 29.3% of the among-population variance in selection ( $F_{1,33} = 13.7$ ,  $p < 0.001$ , Figure  
10 4), with populations experiencing evenly-distributed fishing events throughout the  
11 study being less susceptible to fishery selection. In our study system, fitness  
12 variability is indeed directly linked to the fishing regime, with populations  
13 experiencing constant (even) fishing mortality throughout the season exhibiting  
14 lower fitness variability than populations subjected to sporadic (uneven) fishing  
15 events (see Extended Figure 1). This final component was not obviously linked to  
16 any environmental factors; yet it was the only factor that differed between species,  
17 with rainbow trout exhibiting slightly lower fitness variability than brook trout  
18 (PoVE = 15.1%,  $F_{1,33} = 5.85$ ,  $p < 0.05$ ), potentially due to species-specific behavior  
19 around fishing gears <sup>19,20</sup>.

## 20 Management Implications

21 Decomposing selection into its three components provides an opportunity to  
22 identify the most important component of selection and, simultaneously, the



1 appropriate target for management. Our results suggest that overall selection can be  
2 influenced differentially by each of the three selection components, each associated  
3 with different management strategies to reduce the unintended consequences of  
4 fishing-induced selection. In our particular system, even with gear that is  
5 substantially less selective than those used in modern-day fisheries <sup>21,22</sup>, the most  
6 important factor influencing the strength of fishing-induced selection was the  
7 correlation between fitness and length, i.e., the fishing gear selectivity. In order to  
8 manage populations against the potentially negative effect of size-selective fishing,  
9 managers could introduce fishing gear regulations such as population-specific mesh  
10 combinations protecting the largest individuals <sup>23,24</sup>. In addition, our data suggest  
11 that tributaries entering lakes may provide some protection against size-selective  
12 fishing. Tributaries may provide refuge for larger fish (i.e., a “reduced take zone”)  
13 that decreases susceptibility to size-selective fishing. This supports the argument  
14 that reserves provide an important management tool to mitigate fishing-induced  
15 selection for populations in which selection is mostly driven by fishing gear  
16 selectivity <sup>25-28</sup>.

17 Alternatively, in populations where selection is mostly driven by trait variability,  
18 management measures could focus on increasing the variability in fish length  
19 through the protection of larger fish. Our results further suggest that environmental  
20 characteristics such as habitat suitability and diversity also influence trait  
21 variability, suggesting that habitat restoration activities could be implemented as an  
22 indirect path to promoting trait variability <sup>29</sup>.

1 Finally, where selection is driven by fitness variability, management measures that  
2 target fishing schedules and intensity (e.g., duration of the fishing season, daily  
3 yield) could be effective strategies for reducing fishing-induced selection. Our  
4 results suggest that fitness variability is directly linked to the fishing schedule (see  
5 Extended Figure 1), with even fishing throughout the season being less selective  
6 than infrequent, but intense, fishing events <sup>30</sup>.

7 These findings also highlight an interesting feedback that might shape fisheries-  
8 induced selection, and our ability to detect it. In particular, strong size-selectivity of  
9 fishing gear imposes substantial selection on body size in harvested fishes. At the  
10 same time, however, this selectivity should decrease size (and fitness) variability,  
11 which should reduce the intensity of selection. Therefore, we have a situation where  
12 selection differentials might decrease through time in harvested populations even if  
13 gear selectivity itself is constant. Stated more generally, selection differentials might  
14 not be good indicators of gear selectivity, and investigating how the different  
15 components of selection vary through time might be necessary to assess how size-  
16 selective fishing has impacted populations.

## 17 Conclusions

18 Our study helps explain why the outcomes of fishing-induced selection reported in  
19 the literature are contradictory <sup>4</sup>. First, size-selective fishing becomes increasingly  
20 unpredictable with higher fishing intensity. Second, responses to fishery selection  
21 are population-specific because fishery selection is influenced by demographic- and  
22 habitat-specific factors. Predicting population responses to fishing-induced selection

1 is a key challenge faced by fishery managers <sup>31-33</sup>, but it has been overshadowed by  
2 controversy surrounding its effects and underlying mechanisms <sup>34,35</sup>. By working  
3 with replicated populations, we were able to explore practical principles of fishing-  
4 induced selection that could help guide management of harvested stocks. Most  
5 importantly, evolutionary impact assessments <sup>31</sup> should replicate selection  
6 measures at the subpopulation level to investigate the repeatability of selection  
7 across time and space. Doing so will enable managers to disentangle the  
8 components of selection and to tailor their management actions accordingly.

9 Overall, our study demonstrates that fishing is highly selective, even at low harvest  
10 rates. As size-related traits are heritable <sup>36</sup>, this selection has the potential to  
11 dramatically modify both the size and genetic structures of harvested populations.  
12 However, the outcomes of selection are highly variable and can be modified by  
13 environmental, demographic- and species-specific factors. Disentangling these  
14 factors and the different components of selection (fitness-trait correlation, trait  
15 variability, fitness variability) is critical to producing flexible and relevant  
16 management strategies, but does rely on repeated measurements of selection.  
17 However, such experiments may not need vast numbers of individuals because our  
18 results suggest that selection differentials varied linearly with catch. Evolutionary  
19 impact assessments that incorporate these components of selection will allow  
20 managers to predict how a population will respond to different harvest rates and  
21 management scenarios with far greater accuracy than is currently achieved.

## 1 **Methods**

### 2 Study system: large-scale experimental fisheries

3 The Sierra Nevada mountain range contains thousands of lakes that are naturally  
4 fishless above 1800 meters <sup>37</sup>. Most of these lakes have been stocked with non-  
5 native trout, some as early as 1850, to create recreational fishing opportunities <sup>38</sup>.  
6 By 1996, 63% of the lakes larger than one hectare were inhabited by non-native  
7 populations of rainbow trout (including hybrids with golden trout) and/or brook  
8 trout <sup>38</sup>. In the past 20 years, research has revealed detrimental effects of non-native  
9 fish on native biota, particularly endemic mountain yellow-legged frogs (*Rana*  
10 *muscosa* and *R. sierrae*) <sup>11,16,39</sup>. Consequently, several large-scale fish removal  
11 programs were initiated in Inyo National Forest and in Sequoia, Kings Canyon, and  
12 Yosemite National Parks. These programs involved sinking multimesh (six panels,  
13 each with a different mesh size from 10-38 mm) gillnets (86% of all captures) and  
14 performing electrofishing on lake shores and inlet and outlet streams (14%) <sup>11</sup>. The  
15 multimesh nets are designed to target fish across the full range of sizes and ages,  
16 and are generally considered less selective than traditional fishing gear <sup>23,40</sup>.

17 To date, fish have been completely removed from over 60 locations (lakes and  
18 rivers); and from these, we analyzed lake populations where at least 15 fish were  
19 captured over at least three fishing events. This reduced dataset included 35  
20 populations from 32 lakes: 17 lakes with rainbow trout, 12 lakes with brook trout,  
21 and three lakes with both species. The number of fish removed per lake ranged from

1 19 to 4741 over 29 to 3307 days (Extended Table 1). A total of 47,679 fish were  
2 caught and the total length-at-capture (mm) and date-at-capture were recorded.  
3 The dataset includes almost all the fish present in each lake, excluding only fish that  
4 died from natural mortality during the removal period.

5 The 32 lakes exhibited large variability in environmental and population-specific  
6 parameters (Extended Table 1). Lake size was indexed as lake perimeter (207-2118  
7 m), lake area (1989-124625 m<sup>2</sup>), and maximum depth (2.5-30 m). Lake quality (i.e.,  
8 the potential for rapid fish growth) was indexed as elevation (2146-3583 m; lower  
9 elevations assumed to represent higher quality habitat <sup>16</sup>) and maximum fish length  
10 (200-550 mm). Population size structure was indexed as mean fish length (range  
11 among lakes: 93-347 mm) and length variability (standard deviation; range among  
12 lakes: 27-94 mm). Lakes also differed in population size (19-4741 individuals),  
13 density (5-3355 individuals per ha), and various aspect of the fishing regime,  
14 including the proportion of fish caught with gillnets (28-100%) versus  
15 electrofishing, the number of fishing events (5-114 events), and the mean number of  
16 fish caught per event (2-145 fish per event) or per day during the overall study  
17 duration (0.05-6.9 fish per day).

## 18 Catch and length

19 We assessed the selective effect of fishing by correlating fish length with catch  
20 intensity. Specifically, after every fishing event, we assigned to each fish a catch  
21 intensity value equal to the number of fish caught to date, divided by the total  
22 number of fish in the lake (i.e., the proportion of fish captured to date). We then

1 assessed the relationship between catch intensity and length-at-capture by means of  
2 linear mixed-models; these models included length-at-capture as response variable,  
3 catch intensity and species as a fixed effects, and lake ID as a random effect, allowing  
4 the slope and intercept to vary among lakes. We used the same type of model to  
5 assess the effect of fishing intensity on the variability of length-at-capture, which  
6 was measured after each fishing event, as the standard deviation of the length of all  
7 the fish remaining in the lake. Analyses were performed using both linear and  
8 logarithmic relationships, as changes over time might not be linear. The linear  
9 model had the better fit and so was used in all analyses presented herein. Because  
10 no differences emerged between the two species (rainbow trout and brook trout),  
11 we pooled species for all analyses presented here (Figure 1); we tested for species  
12 effects when analyzing the component of selection (see below and Figure 4).

13 For the sake of simplicity, we first assumed that fish did not grow during the study  
14 period (typically 2-3 years), which would result in a conservative (underestimated)  
15 estimate of selection. This simplification is reasonable given that fish growth is  
16 extremely low in these high elevation lakes due to low temperatures and  
17 productivity, as well as the short growing season <sup>16</sup>. However, to examine the  
18 sensitivity of our results to growth, we next adjusted the observed length-at-capture  
19 at a given capture date by expected growth rate since the start of the experimental  
20 fisheries. To do so, we applied two growth scenarios: a slow growth correction  
21 assuming 5% length increase per year and a fast growth correction assuming 10%  
22 length increase per year. With this method, the length of the fish captured during

1 the course of removal was adjusted to their expected length at the first date of  
2 sampling after allowing for growth.

3 To test if random sampling could explain the observed selective effects of fishing -  
4 estimated as the slopes of the length-catch intensity relationships (Figure 1a), and  
5 variability-catch intensity relationships (Figure 1b) - we performed 100 simulations  
6 where mortality occurred randomly; i.e., we used random permutations of the time-  
7 at-capture of each fish. We performed the same tests (linear mixed models) on the  
8 random simulations, allowing direct comparison of the observed and simulated  
9 data. For each simulation, we extracted the slope of the relationship between length-  
10 at-capture (or length variability) and catch intensity, in order to build an empirical  
11 distribution of the expected change in length (and variability) with catch. We  
12 assumed that these distributions were normally distributed, estimated their means  
13 and standard deviations, and tested if the expected change (based on the mean of  
14 the distributions) differed from zero with one-sample t-tests (Figure 2).

15 When possible, fish were prevented from reaching spawning areas in the associated  
16 streams by makeshift dams and/or gillnets to block access to inlet and outlet  
17 streams. In addition, efforts were made to reduce reproduction during the  
18 experimental fisheries, by searching for and destroying redds (groups of fertilized  
19 eggs buried in spawning grounds). However, some reproduction cannot be  
20 completely ruled out after the initiation of the experimental fisheries, in particular  
21 for brook trout that are known to breed in lake habitat <sup>41</sup>. If any reproduction  
22 occurred, it likely occurred during the first year following removal initiation and

1 likely produced few fish as most adults were removed quickly. To estimate the  
2 potential effect of reproduction after the initiation of the fisheries, we performed a  
3 sensitivity analysis by repeating the analysis after removing fish smaller than 50  
4 mm that were caught after the first year of survey, i.e., 334 fish potentially born after  
5 removal initiation. This is a conservative correction, as we also removed all the  
6 smaller fish born before the start of the study. Re-analyzing the data using this  
7 reduced dataset, the results were nearly identical, with a corrected relationship  
8 between length and catch of  $-97.7 \pm 13.1$  [\*\*\*], i.e., a 5% difference, which is less  
9 than the difference with moderate growth correction (see above). The corrected  
10 relationship between variability and catch was  $-0.34 \pm 0.06$  [\*\*\*], and the corrected  
11 relationship between selection differential and catch was  $-0.34 \pm 0.15$  [\*], see Fig. 1  
12 & 3 for the reported impact. Thus, fishing-induced selection appears to be driven by  
13 the removal of the largest fish, and the effects of potential reproduction during the  
14 program were deemed to be negligible.

### 15 Estimating selection differentials

16 For each lake, we compared the mean length of surviving fish after each fishing  
17 event (1092 events) to the mean length before the same fishing event, yielding a  
18 selection differential for each event in each lake. Under several common  
19 assumptions, this differential is equal to the covariance between trait and relative  
20 fitness<sup>10</sup>. Using this covariance, we can disentangle the different components of  
21 selection into the products of (1) the correlation between the trait and fitness, (2)



1 the variability (standard deviation) of fitness, and (3) the variability of the trait  
2 under selection (see below) <sup>10</sup>.

3 Selection differential:  $\bar{Z}^* - \bar{Z} = cov(W, Z) = cor(W, Z)\sigma_W\sigma_Z$

4 With  $\bar{Z}$  the average value of the trait Z in the population (in this study Z is the length  
5 of the fish),  $\bar{Z}^*$  the average value of the trait Z after selection, i.e., in the sub-  
6 population that survived the harvest event, W the relative fitness,  $\sigma_W$ , the standard  
7 deviation of the relative fitness, and  $\sigma_Z$  the standard deviation of the length in the  
8 initial population.

9 We evaluated fishing-induced selection by correlating selection differentials with  
10 catch intensity. Specifically, for each lake we compared the selection differential  
11 generated by each fishing event to the proportion of fish captured to date (i.e., the  
12 catch intensity, described above). We then assessed the relationship between  
13 selection differentials and catch intensity by means of linear mixed-models; these  
14 models included selection differentials as the response variable, catch intensity as a  
15 fixed effect, and lake ID as a random effect, allowing the slope and intercept to vary  
16 among lakes (Figure 3a).

17 To assess if catch intensity also affected the variability in selection differentials, we  
18 binned catch intensity into 5% intervals and estimated, for each lake, the average  
19 selection differential in each 5% interval. For example, to estimate the average  
20 selection differential in the 15-20% interval, we averaged - for each lake - all the  
21 selection differential estimations with catch intensity being within this interval.

1 Then we measured the between lake variability within each interval as the standard  
2 deviation of the averaged selection differentials. Since there is only one value per  
3 catch interval, we used linear models to assess how the variability in selection  
4 differentials was affected by catch intensity (Figure 3b).

### 5 Selection differential components and environmental parameters

6 In each lake and after each fishing event, we estimated the three components of  
7 selection. Specifically, after each fishing event, fish that had been captured were  
8 assigned a fitness value of zero, and one if not captured. This allowed estimating (1)  
9 the correlation between body length and fitness, the standard deviation of fitness  
10 ( $\sigma_W$ ), and the standard deviation in body length before selection ( $\sigma_Z$ ) in each lake  
11 and after every fishing event. To allow for between-lake comparisons and to  
12 estimate the effect of attributes related to the environment, fish population, or the  
13 fishing regime, we calculated, for each selection component, a single estimate per  
14 lake. For the covariance and the correlation between fitness and trait, we used the  
15 mean value of all estimates (calculated after every fishing event). To estimate the  
16 standard deviation in fitness in each lake ( $\sigma_W$ ), we used the standard deviation of all  
17 individuals' relative time-at-capture (as a proportion of the population captured).  
18 Specifically, within each lake, we transformed the time-at-capture into a [0,1]  
19 variable, with zero being assigned to the fish caught during the first fishing event,  
20 and one assigned to the fish caught during the last fishing event. This value  
21 represents how spread the fishing events are throughout the study duration, and is  
22 minimal when several fishing events are distributed evenly throughout the study

1 and maximal when few fishing events are distributed at the beginning and the end  
2 of the study (see Extended Figure 1). We then estimated the standard deviation in  
3 body length before selection ( $\sigma_Z$ ). Finally, because the selection differential is the  
4 covariance between fitness and trait, and is mathematically linked to the three  
5 components of selection components<sup>10</sup>, we calculated an independent value for the  
6 selection differential. Instead of the covariance between fitness and trait, we used  
7 the relationship between catch and length-at-capture (see Figure 1a) as a proxy for  
8 overall selection. This value represents the magnitude of length change when catch  
9 increases and can be understood as fishing-induced selection. We assessed the  
10 validity of this proxy with a linear regression between the slope of the length-catch  
11 relationship and the covariance between length and fitness (linear regression:  $F_{1,33} =$   
12  $14.3$ ,  $p < 0.001$ ,  $R^2 = 0.30$ ).

13 Finally, we assessed the contribution of each selection component to overall  
14 selection by means of weighted analysis of variance. Specifically, overall selection  
15 was the response variable, the three components of selection were predictor  
16 variables (Figure 4), and the logarithm of population size was the weighting  
17 parameter. We used one-way analysis of variance for each individual component,  
18 but also checked the additive effects of selection components with multiple  
19 regression. Finally, we assessed the contribution of the environmental and  
20 population-specific variables (lake size, lake quality, population structure,  
21 population size, and fishing regime) to each selection component by means of  
22 stepwise linear regression and weighted analysis of variance as before.

1 **Data and statistics**

2 The data that support the findings of this study belong to the National Park Service  
3 and the California Department of Fish and Wildlife, and can be accessed through  
4 them upon reasonable request. The code used to generate results of this study is  
5 available from the corresponding author upon request.

6 All analyses were performed in R <sup>42</sup>. The exact sample size in each group is reported  
7 in Extended Table 1, for both the number of individuals per lake (Pop. size) and for  
8 the number of selection estimates generated after each fishing event (Number of  
9 fishing events). Effects are reported as mean  $\pm$  standard deviation for linear models,  
10 and percentage of variance for analyses of variance. All test are two-sided, and  
11 reported with the value of the statistic and the degrees of freedom. Model  
12 assumptions of residual normality were assessed visually with histograms. Mixed  
13 models were fitted with the `lmer()` function from the package `lme4` <sup>43</sup>. Significance  
14 tests were computed according to Kuznetsova et al. <sup>44</sup> using the package `lmerTest`.

15

## 1 Bibliography

- 2 1. Hixon, M. A., Johnson, D. W. & Sogard, S. M. BOFFFFs: on the importance of  
3 conserving old-growth age structure in fishery populations. *Ices J. Mar. Sci.* **71**,  
4 2171–2185 (2013).
- 5 2. Birkeland, C. & Dayton, P. K. The importance in fishery management of leaving  
6 the big ones. *Trends Ecol. Evol.* **20**, 356–358 (2005).
- 7 3. Conover, D. O. Fisheries - Nets versus nature. *Nature* **450**, 179–180 (2007).
- 8 4. Heino, M., Díaz Pauli, B. & Dieckmann, U. Fisheries-Induced Evolution. *Annu.*  
9 *Rev. Ecol. Evol. Syst.* **46**, 461–480 (2015).
- 10 5. Borrell, B. Ocean conservation: A big fight over little fish. *Nature* **493**, 597–  
11 598 (2013).
- 12 6. Smith, T. B. & Bernatchez, L. Evolutionary change in human-altered  
13 environments. *Mol. Ecol.* **17**, 1–8 (2008).
- 14 7. Law, R. Fisheries-induced evolution: present status and future directions. *Mar.*  
15 *Ecol. Prog. Ser.* **335**, 271–277 (2007).
- 16 8. Hutchings, J. A. & Fraser, D. J. The nature of fisheries- and farming-induced  
17 evolution. *Mol. Ecol.* **17**, 294–313 (2008).
- 18 9. Brodie, E. D., III, Moore, A. J. & Janzen, F. J. Visualizing and quantifying natural  
19 selection. *Trends Ecol. Evol.* **10**, 313–318 (1995).
- 20 10. Lande, R. & Arnold, S. J. The measurement of selection on correlated  
21 characters. *Evolution* **37**, 1210–1226 (1983).
- 22 11. Vredenburg, V. T. Reversing introduced species effects: experimental removal

- 1 of introduced fish leads to rapid recovery of a declining frog. *Proc. Natl. Acad.*  
2 *Sci. USA* **101**, 7646–7650 (2004).
- 3 12. Knapp, R. A. & Matthews, K. R. Non-native fish introductions and the decline of  
4 the mountain yellow-legged frog from within protected areas. *Cons. Biol.* **14**,  
5 428–438 (2001).
- 6 13. Nusslé, S., Brechon, A. & Wedekind, C. Change in individual growth rate and its  
7 link to gill-net fishing in two sympatric whitefish species. *Evol. Ecol.* **25**, 681–  
8 693 (2011).
- 9 14. Nusslé, S., Bornand, C. N. & Wedekind, C. Fishery-induced selection on an  
10 Alpine whitefish: quantifying genetic and environmental effects on individual  
11 growth rate. *Evol. Appl.* **2**, 200–208 (2009).
- 12 15. Kuparinen, A. & Merilä, J. Detecting and managing fisheries-induced evolution.  
13 *Trends Ecol. Evol.* **22**, 652–659 (2007).
- 14 16. Knapp, R. A. & Dudley, T. L. Growth and longevity of golden trout,  
15 *Oncorhynchus aguabonita*, in their native streams. *Calif. Fish Game* **76**, 161–  
16 173 (1990).
- 17 17. Barbour, C. D. & Brown, J. H. Fish species diversity in lakes. *Am. Nat.* **108**, 473–  
18 489 (1974).
- 19 18. Andersen, K. H. & Brander, K. M. Expected rate of fisheries-induced evolution  
20 is slow. *Proc. Natl. Acad. Sci. USA* **106**, 11657–11660 (2009).
- 21 19. Biro, P. A. & Post, J. R. Rapid depletion of genotypes with fast growth and bold  
22 personality traits from harvested fish populations. **105**, 2919–2922 (2008).
- 23 20. Biro, P. A. & Sampson, P. Fishing directly selects on growth rate via behaviour:

- 1           implications of growth-selection that is independent of size. *Proc. R. Soc. B*  
2           **282**, 20142283 (2015).
- 3   21.   Kuparinen, A., Kuikka, S. & Merilä, J. Estimating fisheries-induced selection:  
4           traditional gear selectivity research meets fisheries-induced evolution. *Evol.*  
5           *Appl.* **2**, 234–243 (2009).
- 6   22.   Allendorf, F. W. & Hard, J. J. Human-induced evolution caused by unnatural  
7           selection through harvest of wild animals. *Proc. Natl. Acad. Sci. USA* **106**,  
8           9987–9994 (2009).
- 9   23.   Jensen, J. W. Gillnet selectivity and the efficiency of alternative combinations  
10          of mesh sizes for some freshwater fish. *J. Fish Biol.* **28**, 637–646 (1986).
- 11   24.   Hutchings, J. A. Avoidance of fisheries-induced evolution: management  
12          implications for catch selectivity and limit reference points. *Evol. Appl.* **2**, 324–  
13          334 (2009).
- 14   25.   Hilborn, R. *et al.* When can marine reserves improve fisheries management?  
15          *Ocean Coast. Manage.* **47**, 197–205 (2004).
- 16   26.   Baskett, M. L., Levin, S. A., Gaines, S. D. & Dushoff, J. Marine reserve design and  
17          the evolution of size at maturation in harvested fish. *Ecol. Appl.* **15**, 882–901  
18          (2005).
- 19   27.   Dunlop, E. S., Baskett, M. L., Heino, M. & Dieckmann, U. Propensity of marine  
20          reserves to reduce the evolutionary effects of fishing in a migratory species.  
21          *Evol. Appl.* **2**, 371–393 (2009).
- 22   28.   Baskett, M. L. & Barnett, L. The ecological and evolutionary consequences of  
23          marine reserves. *Annu. Rev. Ecol. Evol. Syst.* (2015). doi:10.1146/annurev-

- 1 ecolsys-112414-054424
- 2 29. Watters, J. V., Lema, S. C. & Nevitt, G. A. Phenotype management: a new  
3 approach to habitat restoration. *Biol. Conserv.* **112**, 435–445 (2003).
- 4 30. Quinn, T. P., Hodgson, S., Flynn, L., Hilborn, R. & Rogers, D. E. Directional  
5 selection by fisheries and the timing of sockeye salmon (*Oncorhynchus nerka*)  
6 migrations. *Ecol. Appl.* **17**, 731–739 (2007).
- 7 31. Laugen, A. T. *et al.* Evolutionary impact assessment: accounting for  
8 evolutionary consequences of fishing in an ecosystem approach to fisheries  
9 management. *Fish Fish.* **15**, 65–96 (2014).
- 10 32. Heino, M. *et al.* Can fisheries-induced evolution shift reference points for  
11 fisheries management? *Ices J. Mar. Sci.* **70**, 707–721 (2013).
- 12 33. Jørgensen, C. *et al.* Ecology: managing evolving fish stocks. *Science* **318**, 1247–  
13 1248 (2007).
- 14 34. Kuparinen, A. & Hutchings, J. A. Consequences of fisheries-induced evolution  
15 for population productivity and recovery potential. *Proc. R. Soc. B* **279**, 2571–  
16 2579 (2012).
- 17 35. Garcia, S. M. *et al.* Conservation. Reconsidering the consequences of selective  
18 fisheries. *Science* **335**, 1045–1047 (2012).
- 19 36. Carlson, S. M. & Seamons, T. R. A review of quantitative genetic components of  
20 fitness in salmonids: implications for adaptation to future change. *Evol. Appl.*  
21 **1**, 222–238 (2008).
- 22 37. Knapp, R. A., Boiano, D. M. & Vredenburg, V. T. Removal of nonnative fish  
23 results in population expansion of a declining amphibian (mountain yellow-



- 1           legged frog, *Rana muscosa*). *Biol. Conserv.* **135**, 11–20 (2007).
- 2   38.   Pister, E. P. Wilderness fish stocking: history and perspective. *Ecosystems* **4**,
- 3           279–286 (2001).
- 4   39.   Vredenburg, V. T. *et al.* Concordant molecular and phenotypic data delineate
- 5           new taxonomy and conservation priorities for the endangered mountain
- 6           yellow-legged frog. *Journal of Zoology* **271**, 361–374 (2007).
- 7   40.   Prchalova, M. *et al.* Size selectivity of standardized multimesh gillnets in
- 8           sampling coarse European species. *Fish. Res.* **96**, 51–57 (2009).
- 9   41.   Blanchfield, P. J. & Ridgway, M. S. Reproductive timing and use of redd sites by
- 10          lake-spawning brook trout (*Salvelinus fontinalis*). *Can J Fish Aquat Sci* **54**, 747–
- 11          756 (1997).
- 12   42.   R Core Team. R: a language and environment for statistical computing. (2013).
- 13   43.   Bates, D., Maechler, M., Bolker, B. M. & Walker, S. Fitting Linear Mixed-Effects
- 14          Models Using lme4. *J. Stat. Softw.* **67**, 1–48 (2015).
- 15   44.   Kuznetsova, A., Brockhoff, P. B. & Christensen, R. H. B. lmerTest: Tests in
- 16          Linear Mixed Effects Models. R package version 2.0-30. (2016).

17

## 18 **Acknowledgments**

19   We thank the dozens of individuals who have been involved in the removal of

20   invasive trout in the Sierra Nevada as well as the National Park Service (particularly

21   Ninette Daniele, Travis Espinoza, and Daniel Boiano) and California Department of

1 Fish and Wildlife (particularly Mitch Lockhart and Sarah Mussulman) for sharing the  
2 data collected. SN was funded by the Swiss National Science Foundation  
3 (P2LAP3\_148434) and the Parrotia Foundation and APH was supported by a  
4 Visiting Miller Professorship from the Miller Institute at UC-Berkeley.

## 5 **Authors contributions**

6 SN and SMC conceived the project. SN analyzed the data. SN, APH, AMS, and SMC  
7 discussed the analyses and wrote the manuscript. RAK and MTB collected data and  
8 provided feedback on the manuscript.

# 1 Figures

## 2 [Figure 1](#)

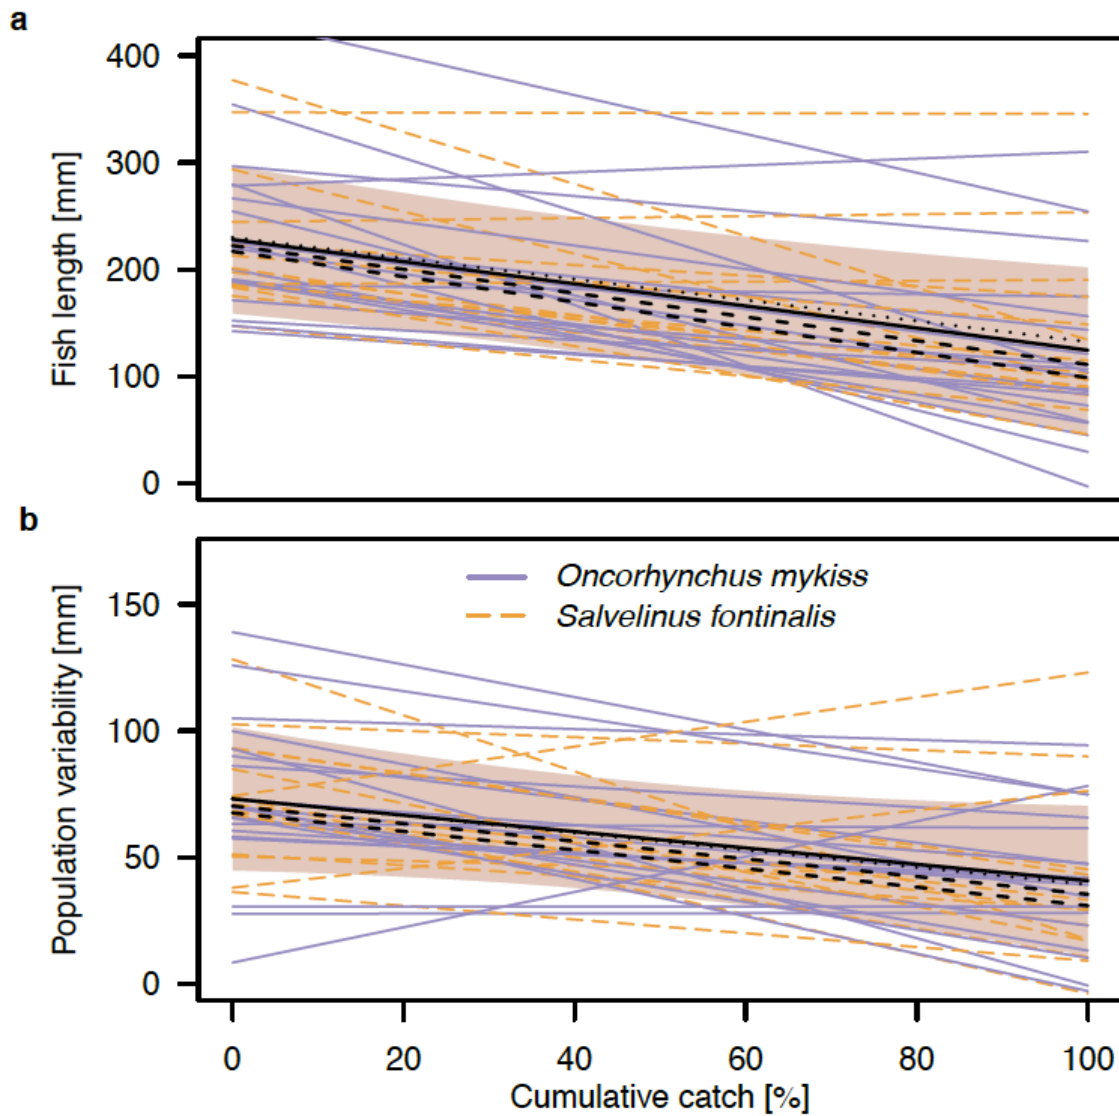

3

4 **Figure 1: Effect of size-selective fishing on population structure.** Plots  
5 demonstrate length-at-capture in mm ( $p < 0.001$ ) (a) and surviving population's  
6 length variability (standard deviation) ( $p < 0.001$ ) (b) as a function of the  
7 percentage of the population removed to date (i.e., the 'catch intensity'). Thin lines

1 represent the response of individual populations (linear regressions), and bold lines  
2 represent the average response of both *Salvelinus fontinalis* (brook trout; dashed  
3 orange) and *Oncorhynchus mykiss* (rainbow trout and hybrids; solid purple)  
4 populations (mixed-model). Black dashed lines represent the average response  
5 using 5% and 10% growth corrections, and black dotted lines represent the  
6 response with correction for reproduction after the initiation of the experimental  
7 fisheries (see Methods). Shaded area represents mean estimates  $\pm$  standard  
8 deviation. Analyses were based on 43,827 individuals in 35 populations in (a), and  
9 1092 standard deviation estimates in(b) (population details reported in Extended  
10 Table 1).

11

1 **Figure 2 – random permutations**

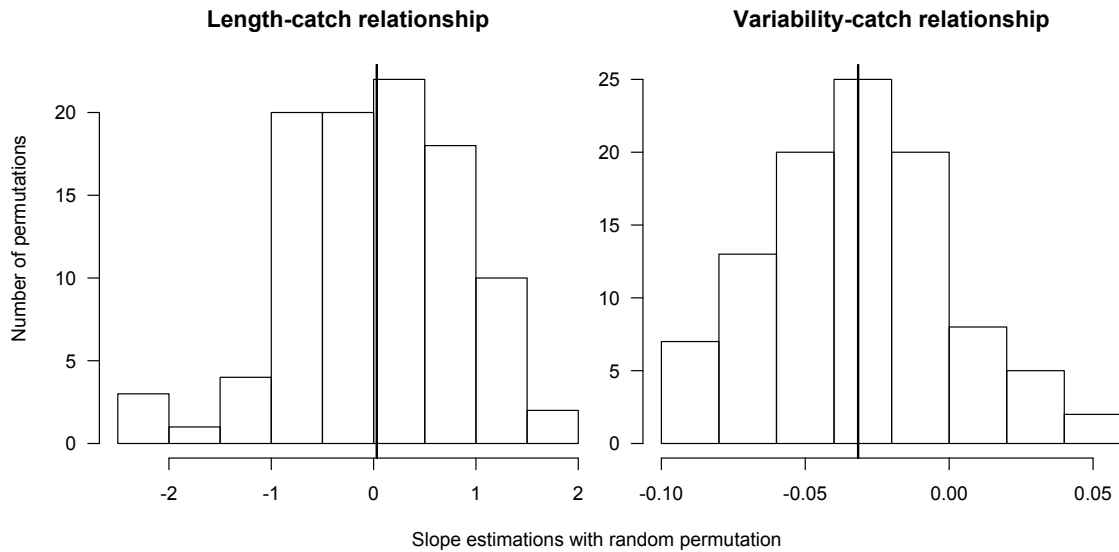

**Figure 2: Empirical distributions of the slopes of the length-catch and variability-catch relationships inferred from random permutations of the date at-capture.** These distributions represent the expected values of the relationship if fishing is random with respect to size (100 random permutations). Random fishing is not expected to alter the size structure of the population (left-hand panel, slope of the length-catch relationship is  $0.08 \pm 1.00$ , not significantly different from zero). Random fishing is expected to slightly reduce variability (right-hand panel, slope of variability-catch relationship =  $-0.03 \pm 0.04$ ), but less than non-random fishing where the slope of the variability-catch relationship is expected to be ten times larger ( $0.32 \text{ mm} \pm 0.07 \text{ mm}/\%$ ).

1 **Figure 3**

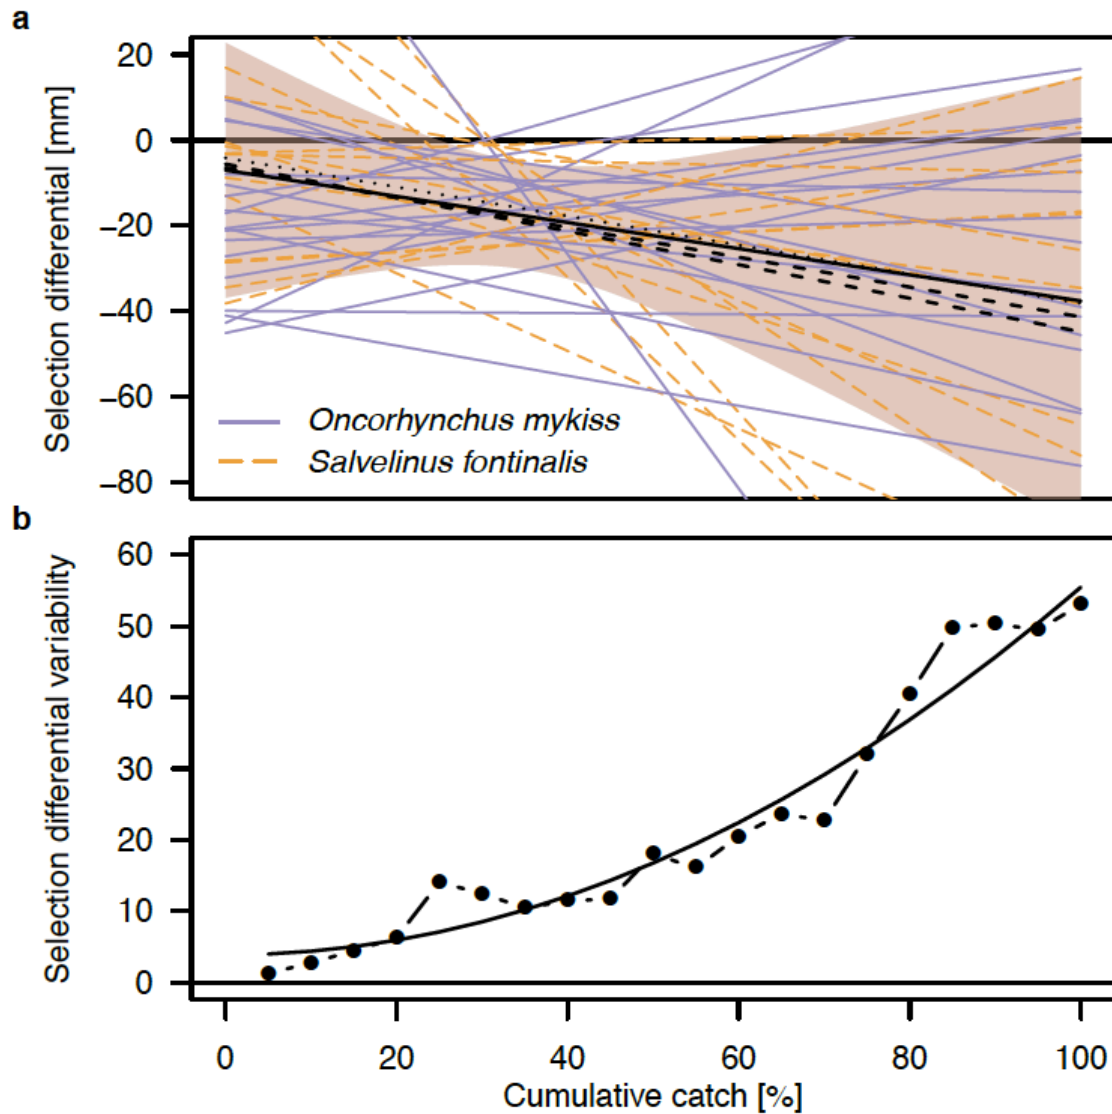

2

3 **Figure 3: Effect of cumulative catch on the selection differential. Plots**

4 demonstrate the selection differential, that is, the difference in mean length between  
5 the initial population (i.e., before fishing) and the survivors (i.e., after fishing) (linear  
6 mixed model,  $p < 0.05$ ) (a) and selection differential variability (standard deviation)  
7 (quadratic model,  $p < 0.001$ ) (b) as a function of the percentage of the population

1 removed to date (i.e., catch intensity). Thin lines represent the responses of  
2 individual populations, and bold lines represent the average response of both  
3 *Oncorhynchus mykiss* (rainbow trout and hybrids; solid purple) and *Salvelinus*  
4 *fontinalis* (brook trout; dashed orange) populations. Dashed black lines represent  
5 the average response using 5% and 10% growth corrections, and black dotted lines  
6 represent the response with correction for reproduction after the initiation of the  
7 experimental fisheries (see Methods). We used 1092 selection differentials  
8 estimates from 35 populations in (a), and one standard deviation estimate per 5%  
9 fraction of catch in (b) (population details reported in Extended Table 1).

1 **Figure 4**

2

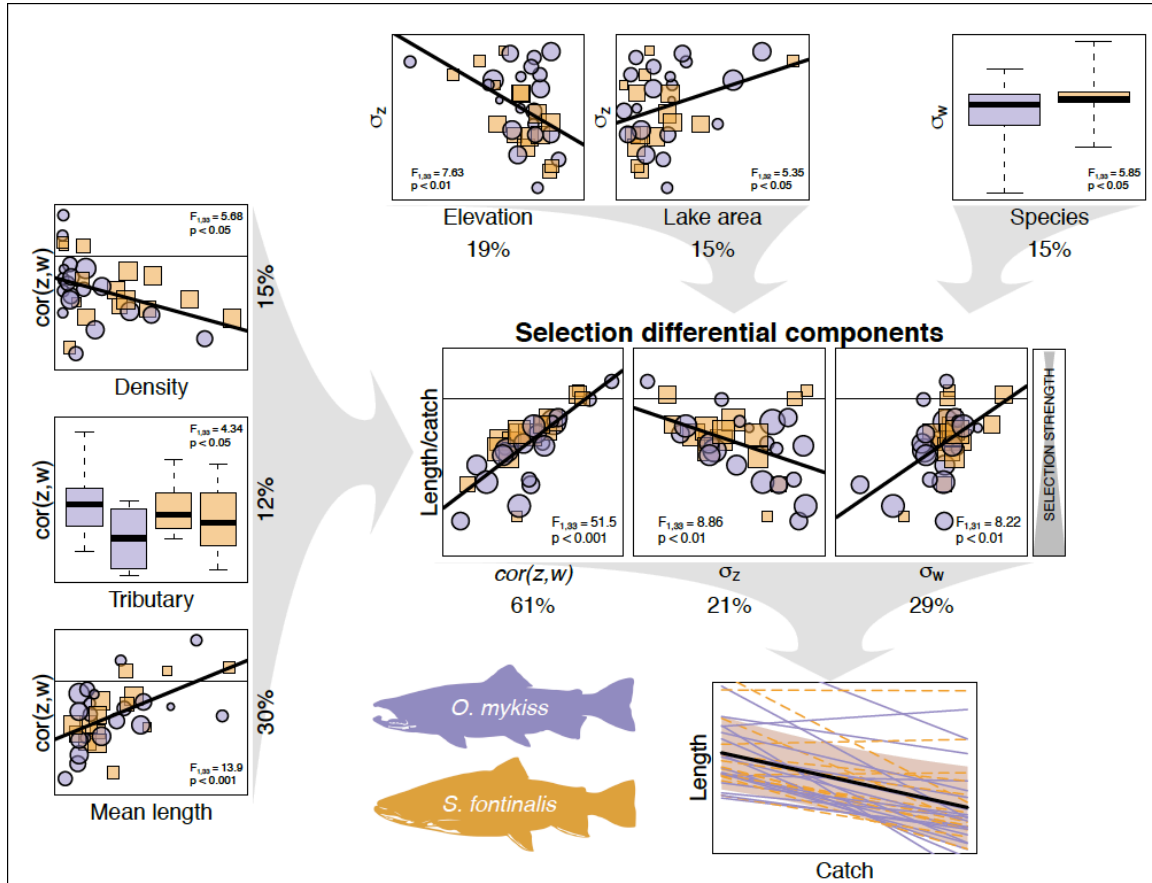

3

4 **Figure 4: Schematic to show the main drivers of fishing-induced selection.** The

5 length-catch relationship (bottom-right) represents selection, as expressed in Figure

6 1a. The three central plots represent the selection differential components (fitness-

7 trait correlation, trait variability, fitness variability) and the relationship between

8 each component and the length-catch relationship, orange circle for rainbow trout

9 and purple square for brook trout (symbol size is proportional to log-transformed

10 population size). The regression statistics are included on each plot. The percentage

11 displayed below each plot represents the univariate proportion of variance



1 explained (note that these do not add up to 100%, as they can be correlated). Using  
2 a multivariate model, the proportion of variance would be: 44% for the correlation,  
3 21% for trait variability, and 17% for fitness variability. The six remaining plots (on  
4 the left and top) represent the influence of environmental, demographic, and  
5 species-specific factors on the selection components. The proportion of variance in a  
6 multivariate model explaining the correlation between trait and fitness (left-hand  
7 plots) is 29.6% for mean length, 13.8% for the presence of a tributary, and 4.2% for  
8 density, and the proportion of variance in a multivariate model explaining the length  
9 variability (top-left) is 18.8% for elevation, and 8.6% for lake area.

10

## 1 Extended Figure 1 – Catch distribution

2

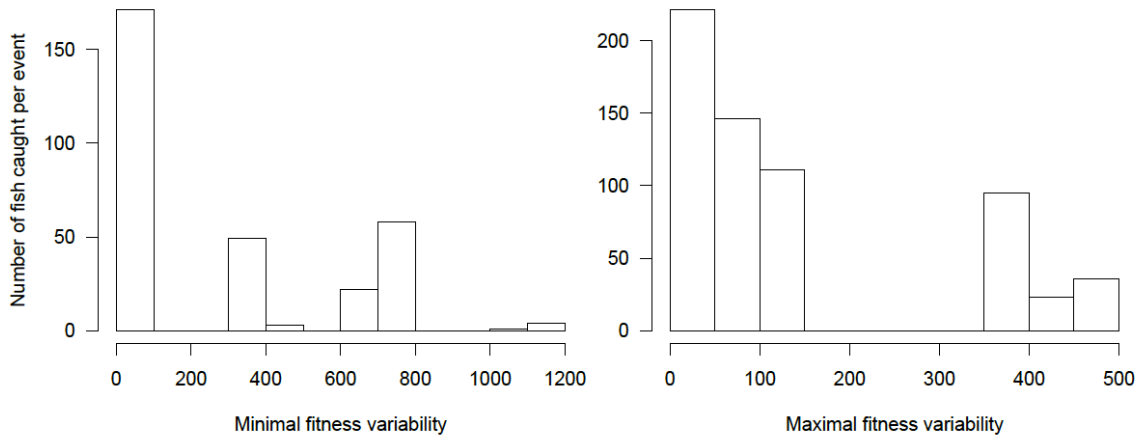

3

Catch distribution over the study duration

4 **Extended Figure 1: representations of the two most extreme catch**  
5 **distributions determining the fitness variability. For the population on the**  
6 **left-hand panel, the fitness variability was minimal and fishing was relatively**  
7 **evenly distributed throughout the study period. For the population on the**  
8 **right-hand panel, the fitness variability was maximal, and fishing events were**  
9 **distributed at the start and end of the study.**

10

## 1 Ext. Table: Environmental and population specific parameters

| Species            | Perimeter [m] | Area [m <sup>2</sup> ] | Elevation [m] | Max depth [m] | Tributary | Pop. size [ind] | Pop. density [ind/ha] | Study duration [days] | Number of fishing events | Prop. of fish caught by gillnets | Average length [mm] | Length stand. dev. [mm] | Length max [mm] |
|--------------------|---------------|------------------------|---------------|---------------|-----------|-----------------|-----------------------|-----------------------|--------------------------|----------------------------------|---------------------|-------------------------|-----------------|
| Rainbow            | 2118          | 47270                  | 2146          | 18            | FALSE     | 120             | 25.4                  | 717                   | 17                       | 1.00                             | 336                 | 88                      | 530             |
| Brook              | 969           | 17129                  | 2566          | 4.1           | TRUE      | 257             | 150.0                 | 275                   | 7                        | 1.00                             | 168                 | 82                      | 344             |
| Rainbow            | 1030          | 23610                  | 3318          | 10            | FALSE     | 375             | 158.8                 | 653                   | 18                       | 0.70                             | 127                 | 86                      | 352             |
| Brook              | 981           | 33508                  | 3380          | 12.6          | FALSE     | 4397            | 1312.2                | 701                   | 114                      | 0.90                             | 199                 | 63                      | 335             |
| Rainbow            | 981           | 33508                  | 3380          | 12.6          | FALSE     | 93              | 27.8                  | 392                   | 24                       | 1.00                             | 296                 | 27                      | 379             |
| Brook              | 470           | 14116                  | 3408          | 5.3           | FALSE     | 4736            | 3355.1                | 689                   | 105                      | 0.85                             | 142                 | 53                      | 265             |
| Brook              | 531           | 15017                  | 3492          | 3.2           | FALSE     | 632             | 420.9                 | 486                   | 33                       | 1.00                             | 188                 | 35                      | 309             |
| Rainbow            | 1167          | 36730                  | 3010          | 14.1          | TRUE      | 19              | 5.2                   | 383                   | 5                        | 1.00                             | 256                 | 70                      | 390             |
| Brook              | 456           | 8855                   | 3157          | 8.5           | FALSE     | 1004            | 1133.8                | 3307                  | 32                       | 1.00                             | 143                 | 52                      | 275             |
| Brook              | 457           | 11122                  | 3266          | 2.7           | FALSE     | 2804            | 2521.1                | 1476                  | 51                       | 0.85                             | 130                 | 46                      | 310             |
| Brook              | 740           | 25365                  | 3300          | 8.7           | FALSE     | 4542            | 1790.7                | 1814                  | 57                       | 0.97                             | 148                 | 52                      | 284             |
| Rainbow            | 1384          | 81257                  | 2949          | 13.8          | FALSE     | 3821            | 470.2                 | 1841                  | 61                       | 0.55                             | 115                 | 79                      | 460             |
| Rainbow            | 1162          | 70134                  | 3338          | 30            | FALSE     | 81              | 11.5                  | 29                    | 9                        | 1.00                             | 179                 | 58                      | 250             |
| Rainbow            | 757           | 14758                  | 3133          | 4             | FALSE     | 1976            | 1338.9                | 1834                  | 67                       | 0.91                             | 149                 | 58                      | 275             |
| Rainbow            | 1552          | 102109                 | 3510          | 22.5          | FALSE     | 1642            | 160.8                 | 1131                  | 31                       | 1.00                             | 210                 | 93                      | 450             |
| Rainbow            | 283           | 5008                   | 3510          | 7             | FALSE     | 884             | 1765.2                | 792                   | 22                       | 1.00                             | 115                 | 53                      | 250             |
| Rainbow            | 853           | 34055                  | 3358          | 4.5           | TRUE      | 599             | 175.9                 | 1431                  | 24                       | 1.00                             | 173                 | 53                      | 328             |
| Brook              | 562           | 20472                  | 3047          | 4.6           | TRUE      | 69              | 33.7                  | 36                    | 5                        | 1.00                             | 251                 | 94                      | 380             |
| Rainbow            | 833           | 30659                  | 3583          | 7.8           | FALSE     | 345             | 112.5                 | 747                   | 13                       | 1.00                             | 184                 | 41                      | 312             |
| Brook              | 871           | 35722                  | 3218          | 8.5           | FALSE     | 3803            | 1064.6                | 751                   | 59                       | 0.75                             | 144                 | 73                      | 250             |
| Rainbow            | 871           | 35722                  | 3218          | 8.5           | FALSE     | 60              | 16.8                  | 447                   | 21                       | 0.50                             | 124                 | 81                      | 250             |
| Rainbow            | 805           | 44565                  | 3115          | 16            | FALSE     | 807             | 181.1                 | 437                   | 43                       | 1.00                             | 214                 | 92                      | 420             |
| Brook              | 482           | 12109                  | 3516          | 5             | FALSE     | 485             | 400.5                 | 397                   | 28                       | 1.00                             | 188                 | 38                      | 257             |
| Brook              | 759           | 37403                  | 3509          | 25            | FALSE     | 4741            | 1267.5                | 1158                  | 41                       | 1.00                             | 105                 | 59                      | 350             |
| Brook              | 207           | 1989                   | 2972          | 5             | TRUE      | 56              | 281.5                 | 38                    | 5                        | 1.00                             | 220                 | 77                      | 359             |
| Brook              | 1330          | 57880                  | 2987          | 15            | FALSE     | 2764            | 477.5                 | 698                   | 19                       | 1.00                             | 127                 | 58                      | 302             |
| Brook              | 527           | 11553                  | 3214          | 4             | FALSE     | 1946            | 1684.4                | 487                   | 73                       | 0.56                             | 112                 | 73                      | 250             |
| Rainbow            | 527           | 11553                  | 3214          | 4             | FALSE     | 45              | 39.0                  | 473                   | 21                       | 0.80                             | 138                 | 66                      | 200             |
| Rainbow            | 578           | 18206                  | 3188          | 10            | FALSE     | 1437            | 789.3                 | 1455                  | 45                       | 1.00                             | 114                 | 43                      | 320             |
| Rainbow            | 854           | 37123                  | 2903          | 10            | FALSE     | 98              | 26.4                  | 1833                  | 18                       | 0.28                             | 131                 | 77                      | 370             |
| Rainbow            | 252           | 2267                   | 3344          | 2.5           | TRUE      | 639             | 2818.7                | 421                   | 20                       | 0.60                             | 113                 | 64                      | 278             |
| Rainbow            | 418           | 10980                  | 3347          | 5.5           | TRUE      | 302             | 275.0                 | 420                   | 14                       | 0.32                             | 93                  | 90                      | 315             |
| Rainbow            | 688           | 23470                  | 3408          | 11            | FALSE     | 1539            | 655.7                 | 450                   | 29                       | 0.48                             | 115                 | 75                      | 360             |
| Rainbow            | 356           | 7220                   | 3402          | 7             | FALSE     | 308             | 426.6                 | 1161                  | 25                       | 1.00                             | 132                 | 82                      | 348             |
| Brook <sub>2</sub> | 1444          | 124625                 | 2815          | 10            | FALSE     | 253             | 20.3                  | 68                    | 23                       | 1.00                             | 347                 | 89                      | 550             |
